# Supplementary material for: Optimization of the Preparation Process of Glucuronomannan Oligosaccharides and Their Effects on the Gut Microbiota in MPTP-Induced PD Model Mice
Source: MDPI journal article supplement (doi:10.3390/md22050193), 2024-04-25
Supplement: s1 [file s1]

## Supplemental Material

# Optimization of the preparation process of glucuronomannan oligosaccharides and their effects on the gut microbiota in MPTP-induced PD model mice

Baoxiang Wang<sup>1,2</sup>, Lihua Geng<sup>2,3,4,\*</sup>, Jing Wang<sup>2,3,4</sup>, Yuxi Wei<sup>1</sup>, Changhui Yan<sup>2,5</sup>, Ning Wu<sup>2,4</sup>, Yang Yue<sup>2,3,4</sup>, Quanbin Zhang<sup>2,3,4,\*</sup>

<sup>1</sup> College of Life Sciences, Qingdao University, 308 Ningxia Road, Qingdao 266003, China; [wangbaoxiangcn@163.com](mailto:wangbaoxiangcn@163.com); [yuxiw729@163.com](mailto:yuxiw729@163.com)

<sup>2</sup> CAS and Shandong Province Key Laboratory of Experimental Marine Biology, Institute of Oceanology, Chinese Academy of Sciences, Qingdao 266071, China; [jingwang@qdio.ac.cn](mailto:jingwang@qdio.ac.cn) (J.W.); [yich2747141850@163.com](mailto:yich2747141850@163.com) (C.Y.); [wuning@qdio.ac.cn](mailto:wuning@qdio.ac.cn) (N.W.); [yueyang@qdio.ac.cn](mailto:yueyang@qdio.ac.cn) (Y.Y.)

<sup>3</sup> Laboratory for Marine Biology and Biotechnology, Qingdao Marine Science and Technology Center, Qingdao 266237, China

<sup>4</sup> Center for Ocean Mega-Science, Chinese Academy of Sciences, Qingdao 266071, China

<sup>5</sup> Key Laboratory of Optic-electric Sensing and Analytical Chemistry for Life Science, MOE, College of Chemistry and Molecular Engineering, Qingdao University of Science and Technology, Qingdao 266042, PR China; [yich2747141850@163.com](mailto:yich2747141850@163.com)

\* Correspondence: [lhgeng@qdio.ac.cn](mailto:lhgeng@qdio.ac.cn), Tel: +86-532-8289-8703; [qbzhang@qdio.ac.cn](mailto:qbzhang@qdio.ac.cn), Tel: +86-532-8289-8708.

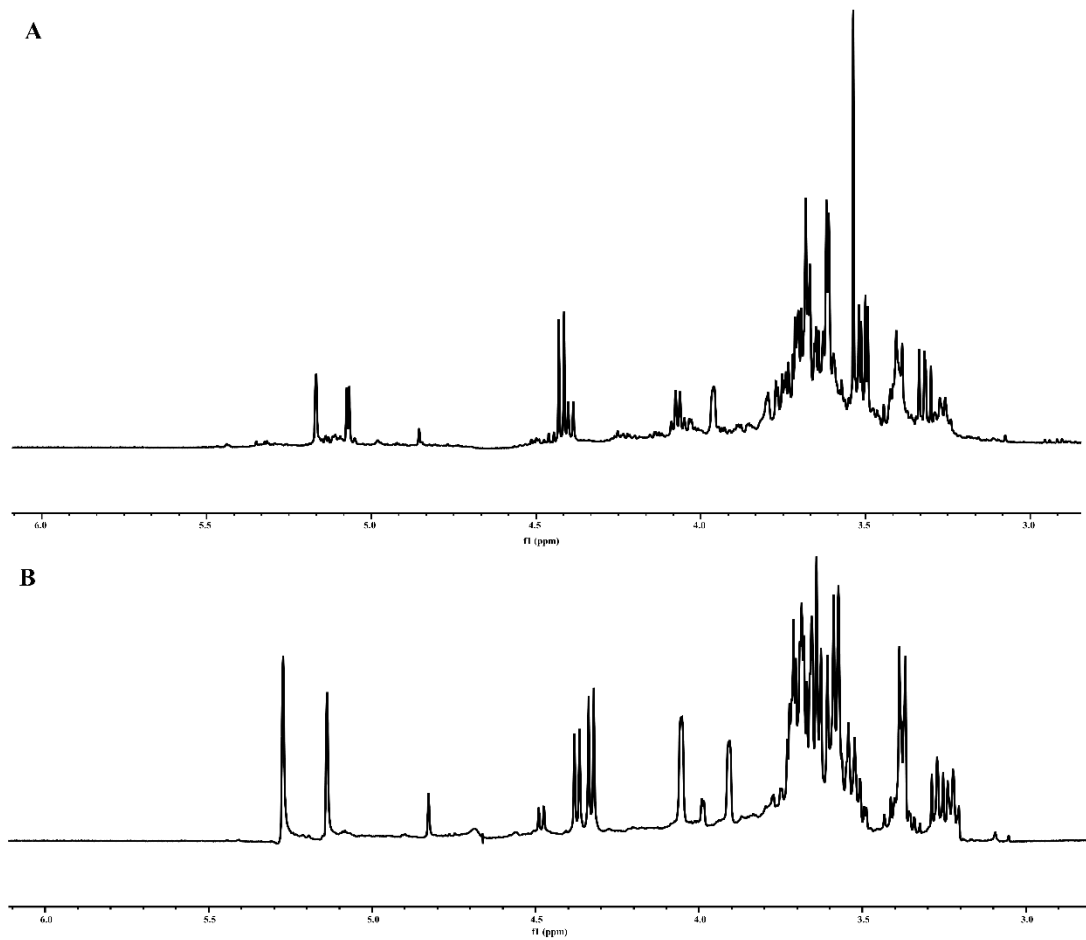

Figure S1.  $^1\text{H}$ -NMR spectra of GMn. (A)  $^1\text{H}$ -NMR spectra of G2 (GM1) (B)  $^1\text{H}$ -NMR spectra of G3 (GM2).
